# Supplementary material for: Theoretical studies on the mechanism of Ru(ii)-catalyzed regioselective C–H allylation of indoles with allyl alcohols
Source: Royal Society of Chemistry journal article supplement (doi:10.1039/c9dt01674k), 2019-01-01
Supplement: c9dt01674k2.pdf [file c9dt01674k2.pdf]

**Electronic Supplementary Material (ESI) for Dalton Transactions.**

**This journal is © The Royal Society of Chemistry 2019**

**Electronic Supplementary Information**

Theoretical Studies on Mechanism of Ru(II)-Catalyzed Regioselective C-H Allylation of Indoles

with Allyl Alcohols

*Chao Deng,\* Po Hu, YouJia Wang, Shaowei Wang and Weihua Zhang\**

Jiangsu Key Laboratory of Pesticide Science, College of Sciences, Nanjing Agricultural University,  
Nanjing 210095, P. R. China.

Emails: [chaodeng@njau.edu.cn](mailto:chaodeng@njau.edu.cn); [njzhangwh@126.com](mailto:njzhangwh@126.com)

Contents

|                                                                        |    |
|------------------------------------------------------------------------|----|
| 1. SP calculation results through def2-tzvp and SDD+f basis sets ..... | S2 |
| 2. Figure S2.....                                                      | S2 |
| 3. Figure S3.....                                                      | S3 |

1. SP calculation results through def2-tzvp and SDD+f basis sets for structures in Figure 1.

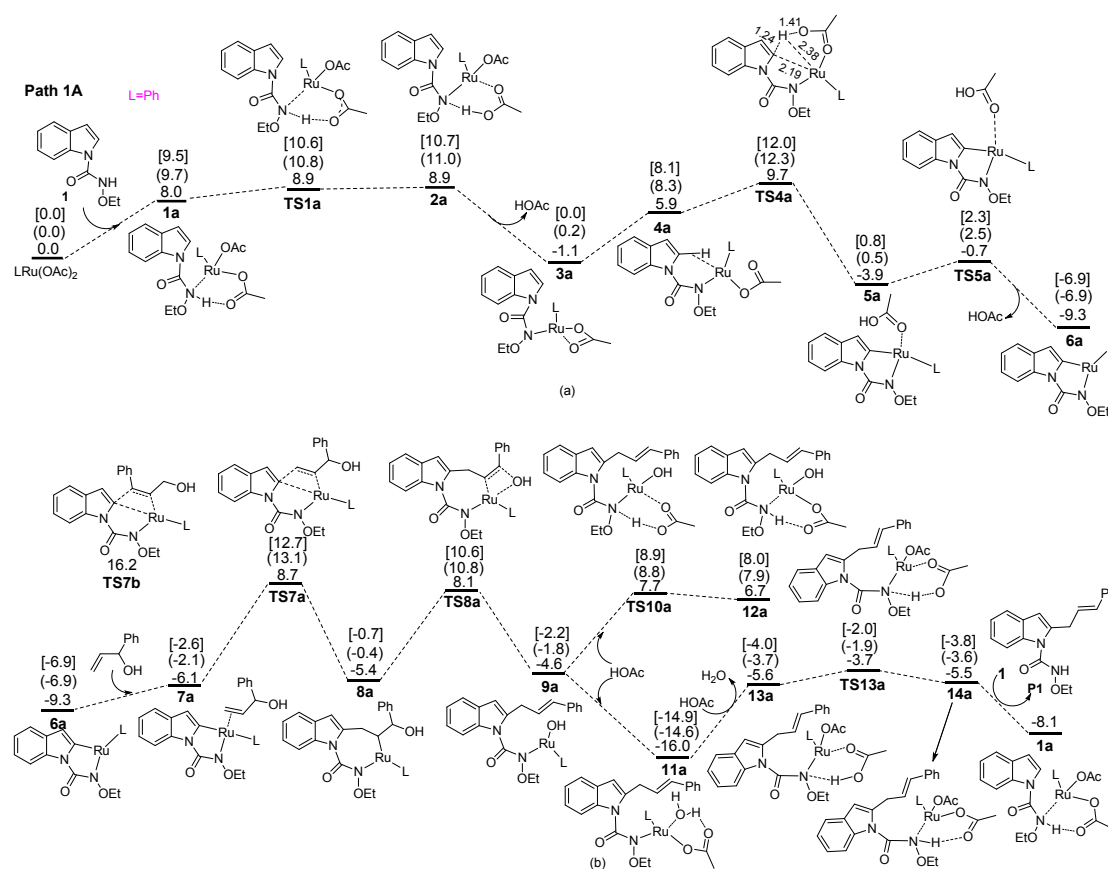

**Fig. S1** Energy profile calculated for the C2-H allylation of indole through the C-Ru bond insertion. The solvation-corrected relative free energies are given in kcal/mol. SP calculation results through def2-tzvp and SDD+f basis sets for structures in Figure 1. The values in parentheses are computed with def2-tzvp basis set for Ru(II) and the values in square brackets are computed with SDD+f basis set for Ru(II).

2. Fig. S2

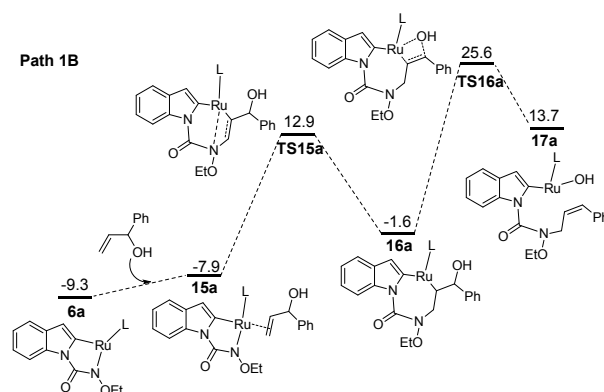

**Fig. S2** Energy profile calculated for the N-Ru bond insertion via C2-H activation. The solvation-corrected relative free energies are given in kcal/mol.

3. Fig. S3

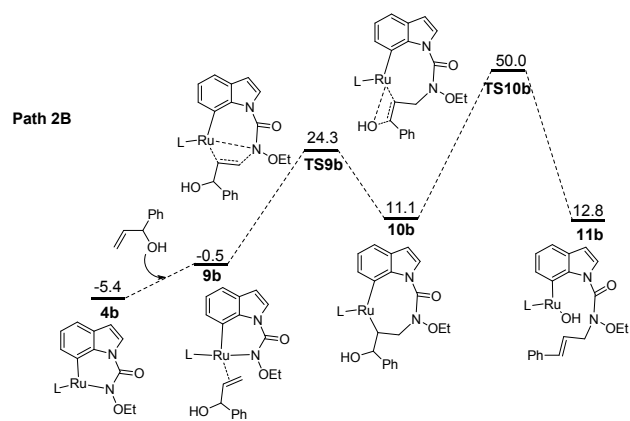

**Fig. S3** Energy profile calculated for the N-Ru bond insertion via C7-H activation. The solvation-corrected relative free energies are given in kcal/mol.
